# Supplementary material for: Facile template-free synthesis of 3D porous MnO/C microspheres with controllable pore size for high-performance lithium-ion battery anodes
Source: Royal Society of Chemistry journal article supplement (doi:10.1039/c4ta01587h), 2014-01-01
Supplement: c4ta01587h1.pdf [file c4ta01587h1.pdf]

## Supporting Information

### Facile template-free synthesis of 3D porous MnO/C microspheres with controllable pore size for high-performance lithium-ion battery anodes

Kai Su,<sup>a</sup> Chao Wang,<sup>b</sup> Honggang Nie,<sup>a</sup> Yan Guan,<sup>a</sup> Feng Liu<sup>\*a</sup> and Jitao Chen<sup>\*a</sup>

<sup>a</sup>Beijing National Laboratory for Molecular Science, Key Laboratory of Bioorganic Chemistry and Molecular Engineering of Ministry of Education, College of Chemistry and Molecular Engineering, Peking University, Beijing 100871, China

\*E-mail: liufeng@pku.edu.cn; chenjitao@pku.edu.cn

Tel: 86-10-62761187; Fax: 86-10-62751708

<sup>b</sup>College of Materials Science and Engineering, Huazhong University of Science and Technology, Wuhan 430074, China.

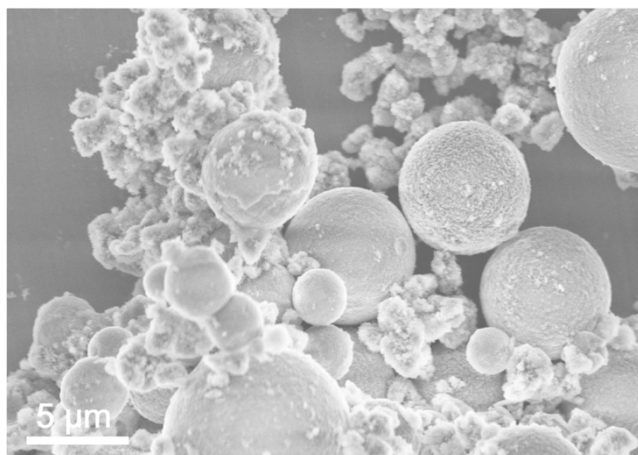

**Fig. S1** SEM image of Mn<sub>2/3</sub>Zn<sub>1/3</sub>CO<sub>3</sub> prepared without the aid of ultrasonic.

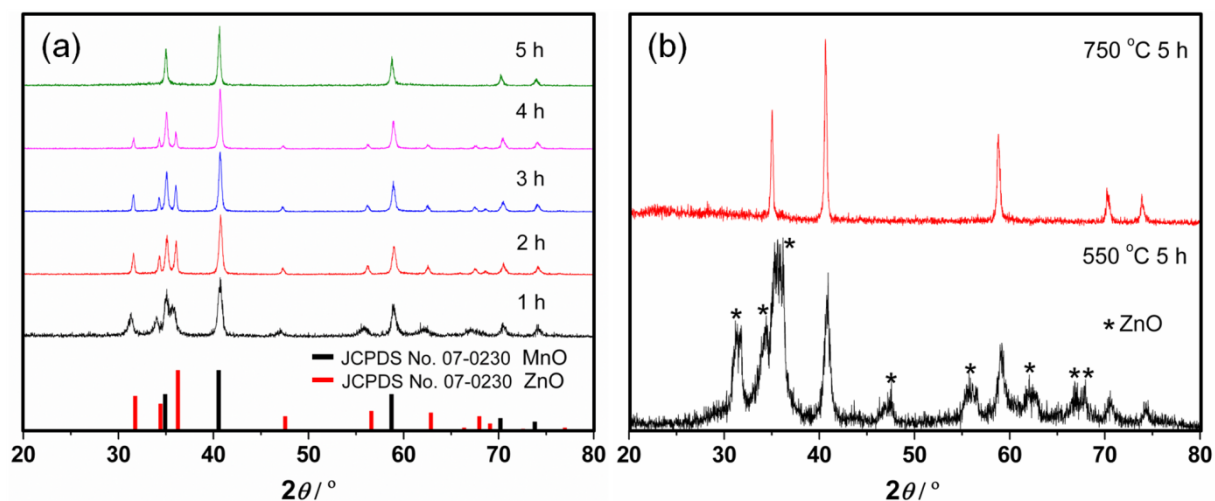

**Fig. S2** XRD patterns of the calcined products of  $\text{Mn}_{2/3}\text{Zn}_{1/3}\text{CO}_3$  obtained at (a) 650 °C for different annealing time, and (b) 550 °C and 750 °C for 5 h.

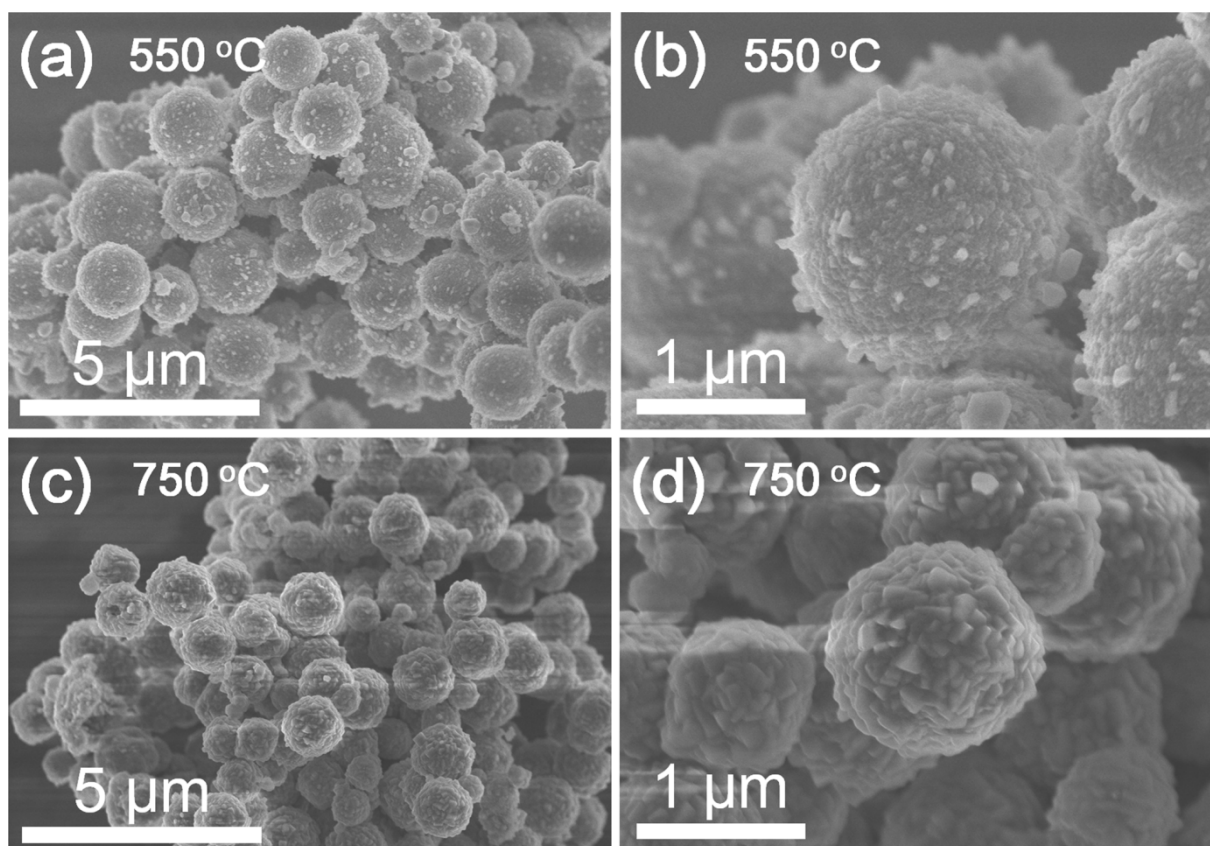

**Fig. S3** SEM images of the calcined products of  $\text{Mn}_{2/3}\text{Zn}_{1/3}\text{CO}_3$  obtained at 550 °C and 750 °C for 5 h.

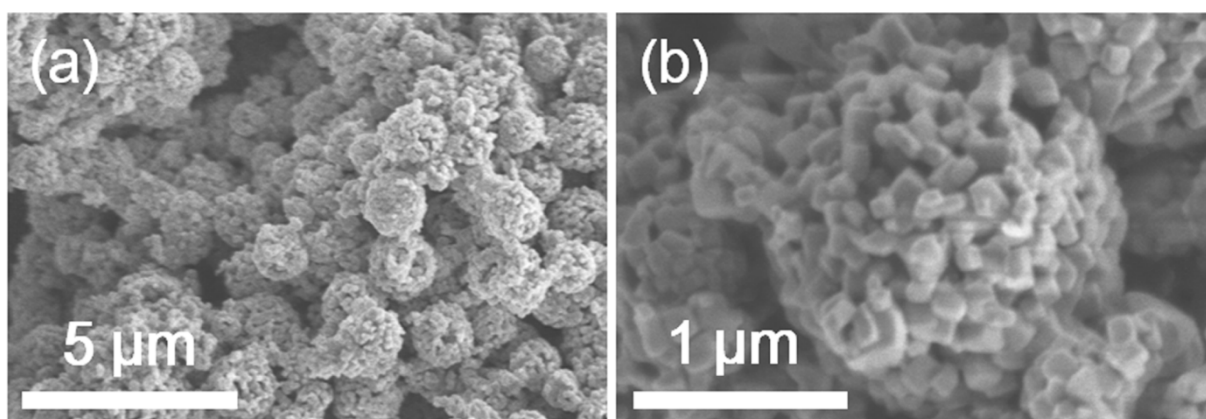

**Fig. S4** SEM images of bare MnO prepared from  $\text{Mn}_{1/2}\text{Zn}_{1/2}\text{CO}_3$  in the absence of glucose.

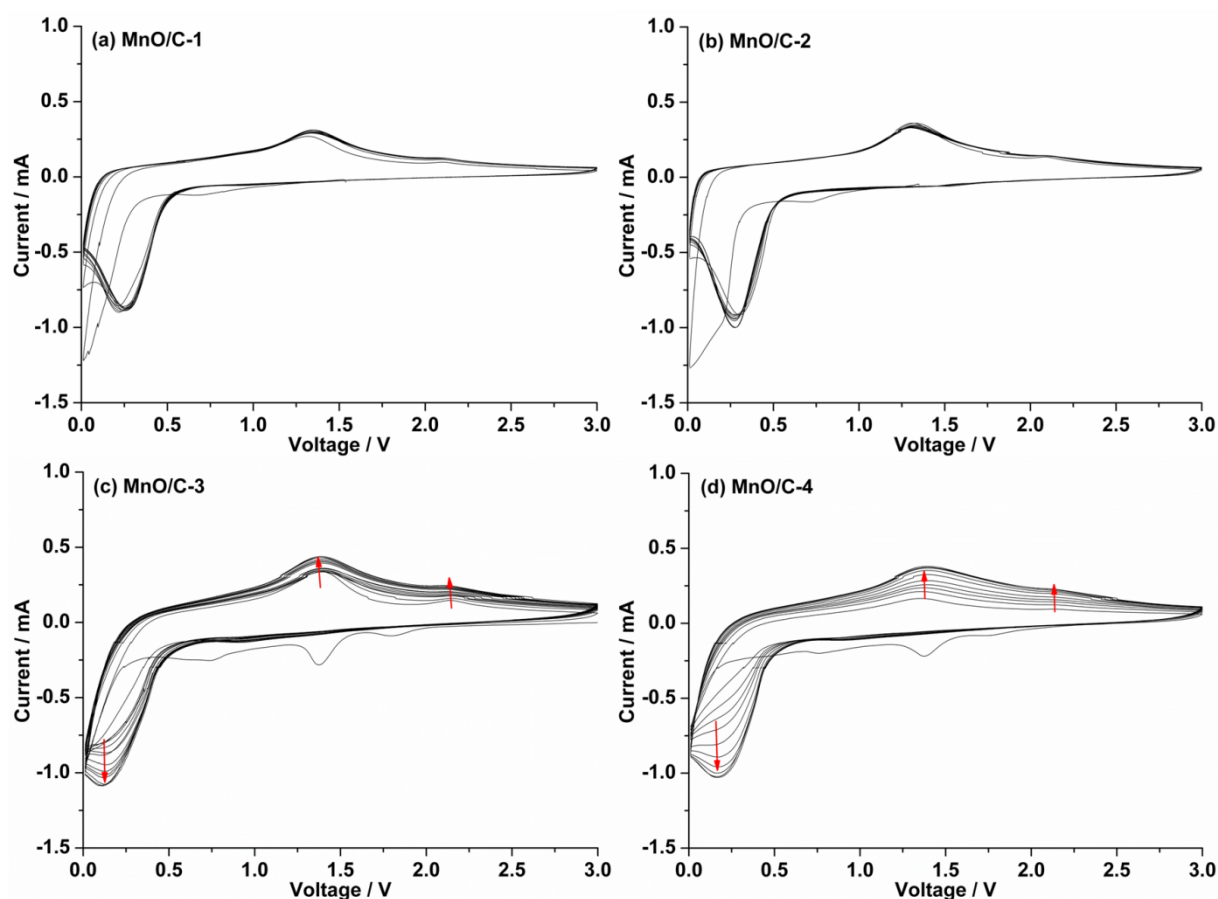

**Fig. S5** Cyclic voltammograms of four MnO/C materials obtained at a scan rate of  $0.5 \text{ mV s}^{-1}$  between 0.01 and 3 V.

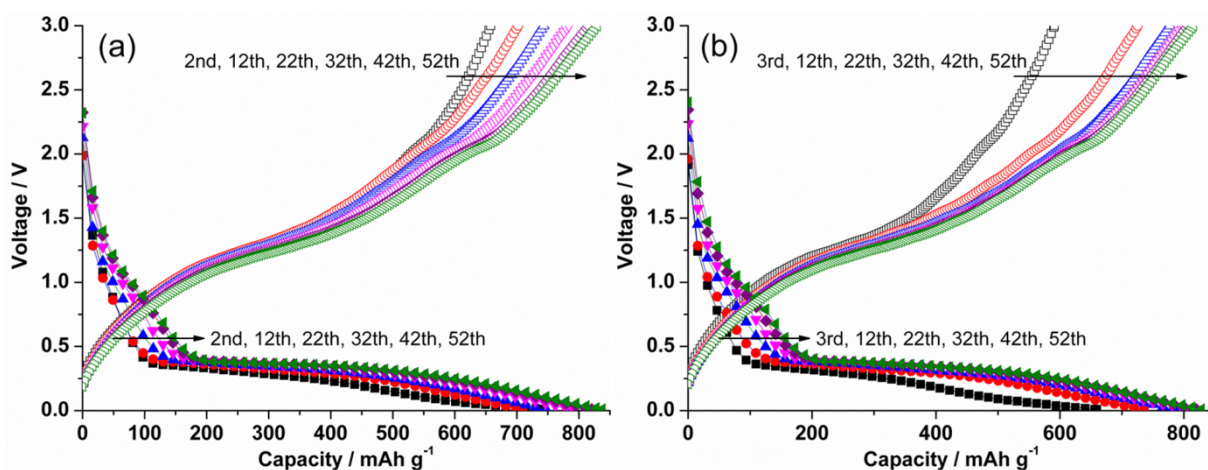

**Fig. S6** The discharge-charge curves of MnO/C-3 (a) and MnO/C-4 (b) at the charge and discharge current densities of 200 and 800 mA g<sup>-1</sup>, respectively.

**Table S1** BET surface areas and pore sizes of the reported porous MnO materials.

| Sample                          | Specific surface area<br>(m <sup>2</sup> g <sup>-1</sup> ) | Pore size<br>(nm) | Ref. |
|---------------------------------|------------------------------------------------------------|-------------------|------|
| MnO/graphite nanosheet          | 58.1                                                       | —                 | 1    |
| MnO                             | 52.5                                                       | 20/60             | 2    |
| MnO@C core-shell nanowire       | 6.86                                                       | 13.2              | 3    |
| MnO@1-D carbon composite        | 64                                                         | 24.57             | 4    |
| MnO/graphene                    | 50.3                                                       | 2.6               | 5    |
| Mesoporous MnO/C network        | 82.7                                                       | 2.8/7.6           | 6    |
| Porous C–MnO disk               | 75.3                                                       | ~13               | 7    |
| Porous MnO/C nanotube           | 40                                                         | 7.7               | 8    |
| Hollow porous MnO/C microsphere | 76.9                                                       | 10.9/86.8         | 9    |

**Table S2** Electrochemical performances of the reported MnO anode materials.

| Sample                    | Reversible capacity (mAh g <sup>-1</sup> )<br>(Current density (mA g <sup>-1</sup> )) | Ref. |
|---------------------------|---------------------------------------------------------------------------------------|------|
| MnO/graphite nanosheet    | 750(100), 230(600)                                                                    | 1    |
| MnO                       | 776.5(100), 350(1600)                                                                 | 2    |
| MnO@C core-shell nanowire | 816(100), 462(2000)                                                                   | 3    |
| MnO@1-D carbon composite  | 850(200), 350(3000)                                                                   | 4    |
| MnO/graphene              | 921.7(200), 625.8(3000)                                                               | 5    |
| Mesoporous MnO/C network  | 1224(200), 731(1500)                                                                  | 6    |
| Porous C–MnO disk         | 1044.2(100), 534.6(1000)                                                              | 7    |

|                                     |                               |    |
|-------------------------------------|-------------------------------|----|
| Porous MnO/C nanotube               | 744.1(200), 302.5(3200)       | 8  |
| Hollow porous MnO/C microsphere     | 741.8(100), 234.7(3000)       | 9  |
| MnO nanorod                         | 627(0.1 mA cm <sup>-2</sup> ) | 10 |
| C/MnO                               | 585(100), 210(1600)           | 11 |
| MnO/C core-shell nanorod            | 790(200)                      | 12 |
| Coaxial MnO/C nanotube              | 500(188.9)                    | 13 |
| MnO/C                               | 440(150), 235(755)            | 14 |
| MnO/graphene nanosheet              | 650(151), 410(3778)           | 15 |
| N-MnO/graphene nanosheet            | 700(100), 260(2000)           | 16 |
| MnO@C core-shell nanoplate          | 770(200)                      | 17 |
| MnO/graphene nanosheet              | 670(100), 402(1000)           | 18 |
| MnO/reduced graphene oxide sheet    | 542.5(200), 325.6(800)        | 19 |
| MnO/carbon nanotubes                | 605.0(100), 424.9(1000)       | 20 |
| Multi-walled carbon nanotubes/MnO/C | 670(100), 390(2580)           | 21 |
| MnO/multi-walled carbon nanotubes   | 532.3(180.12)                 | 22 |
| MnO/C                               | 200(25)                       | 23 |
| MnO/C                               | 688.5(100)                    | 24 |
| MnO/N-doped carbon webs             | 900(200), 600(2500)           | 25 |
| Porous MnO/C microsphere            | 730(100), 410(1600)           | 26 |
| Porous MnO nanoflake                | 568.7(246), 376.4(2460)       | 27 |
| Porous MnO@C microsphere            | 560(200), 308(800)            | 28 |
| MnO@C core-shell composites         | 839(200), 644(3000)           | 29 |
| Porous MnO microsphere              | 769(151), 577.2(1510)         | 30 |
| 3D MnO/carbon nanosheets            | 890(200), 685(2000)           | 31 |
| Carbon nanofiber@MnO                | 750(200)                      | 32 |

## References

- 1 S. Y. Liu, J. Xie, Y. X. Zheng, G. S. Cao, T. J. Zhu and X. B. Zhao, *Electrochim. Acta*, 2012, **66**, 271–278.
- 2 G. L. Xu, Y. F. Xu, J. C. Fang, F. Fu, H. Sun, L. Huang, S. H. Yang and S. G. Sun, *ACS Appl. Mater. Interfaces*, 2013, **5**, 6316–6323.
- 3 X. W. Li, S. L. Xiong, J. F. Li, X. Liang, J. Z. Wang, J. Bai and Y. T. Qian, *Chem. Eur. J.*, 2013, **19**, 11310–11319.
- 4 X. N. Li, Y. C. Zhu, X. Zhang, J. W. Liang and Y. T. Qian, *RSC Adv.*, 2013, **3**, 10001–10006.
- 5 Y. M. Sun, X. L. Hu, W. Luo, F. F. Xia and Y. H. Huang, *Adv. Funct. Mater.*, 2012, **23**, 2436–2444.

- 6 W. Luo, X. L. Hu, Y. M. Sun and Y. H. Huang, *ACS Appl. Mater. Interfaces*, 2013, **5**, 1997–2003.
- 7 Y. M. Sun, X. L. Hu, W. Luo and Y. H. Huang, *J. Mater. Chem.*, 2012, **22**, 19190–19195.
- 8 G. L. Xu, Y. F. Xu, H. Sun, F. Fu, X. M. Zheng, L. Huang, J. T. Li, S. H. Yang and S. G. Sun, *Chem. Commun.*, 2012, **48**, 8502–8504.
- 9 Y. Xia, Z. Xiao, X. Dou, H. Huang, X. H. Lu, R. J. Yan, Y. P. Gan, W. J. Zhu, J. P. Tu, W. K. Zhang and X. Y. Tao, *ACS Nano*, 2013, **7**, 7083–7092.
- 10 X. P. Fang, X. Lu, X. W. Guo, Y. Mao, Y. S. Hu, J. Z. Wang, Z. X. Wang, F. Wu, H. K. Liu and L. Q. Chen, *Electrochem. Commun.*, 2010, **12**, 1520–1523.
- 11 K. F. Zhong, X. Xia, B. Zhang, H. Li, Z. X. Wang and L. Q. Chen, *J. Power Sources*, 2010, **195**, 3300–3308.
- 12 B. Sun, Z. X. Chen, H. S. Kim, H. Ahn and G. X. Wang, *J. Power Sources*, 2011, **196**, 3346–3349.
- 13 Y. L. Ding, C. Y. Wu, H. M. Yu, J. Xie, G. S. Cao, T. J. Zhu, X. B. Zhao and Y. W. Zeng, *Electrochim. Acta*, 2011, **56**, 5844–5848.
- 14 Y. M. Liu, X. Y. Zhao, F. Li and D. G. Xia, *Electrochim. Acta*, 2011, **56**, 6448–6452.
- 15 C. T. Hsieh, C. Y. Lin and J. Y. Lin, *Electrochim. Acta*, 2011, **56**, 8861–8867.
- 16 K. J. Zhang, P. X. Han, L. Gu, L. X. Zhang, Z. H. Liu, Q. S. Kong, C. J. Zhang, S. M. Dong, Z. Y. Zhang, J. H. Yao, H. X. Xu, G. L. Cui and L. Q. Chen, *ACS Appl. Mater. Interfaces*, 2012, **4**, 658–664.
- 17 X. Zhang, Z. Xing, L. L. Wang, Y. C. Zhu, Q. W. Li, J. W. Liang, Y. Yu, T. Huang, K. B. Tang, Y. T. Qian and X. Y. Shen, *J. Mater. Chem.*, 2012, **22**, 17864–17869.
- 18 D. F. Qiu, L. Y. Ma, M. B. Zheng, Z. X. Lin, B. Zhao, Z. Wen, Z. B. Hu, L. Pu and Y. Shi, *Mater. Lett.*, 2012, **84**, 9–12.
- 19 Y. J. Mai, D. Zhang, Y. Q. Qiao, C. D. Gu, X. L. Wang and J. P. Tu, *J. Power Sources*, 2012, **216**, 201–207.
- 20 S. D. Xu, Y. B. Zhu, Q. C. Zhuang and C. Wu, *Mater. Res. Bull.*, 2013, **48**, 3479–3484.
- 21 X. F. Sun, Y. L. Xu, P. Ding, G. G. Chen and X. Y. Zheng, *Mater. Lett.*, 2012, **113**, 186–189.
- 22 X. F. Sun, Y. L. Xu, P. Ding, M. R. Jia and G. Ceder, *J. Power Sources*, 2013, **244**, 690–694.
- 23 Q. Hao, L. Q. Xu, G. D. Li, Z. C. Ju, C. H. Sun, H. Y. Ma and Y. T. Qian, *J. Alloy. Compd.*, 2011, **509**, 6217–6221.
- 24 J. Liu and Q. M. Pan, *Electrochem. Solid-State Lett.*, 2010, **13**, A139–A142.

- 25 W. M. Chen, L. Qie, Y. Shen, Y. M. Sun, L. X. Yuan, X. L. Hu, W. X. Zhang and Y. H. Huang, *Nano Energy*, 2013, **2**, 412–418.
- 26 K. F. Zhong, B. Zhang, S. H. Luo, W. Wen, H. Li, X. J. Huang and L. Q. Chen, *J. Power Sources*, 2011, **196**, 6802–6808.
- 27 X. W. Li, D. Li, L. Qiao, X. H. Wang, X. L. Sun, P. Wang and D. Y. He, *J. Mater. Chem.*, 2012, **22**, 9189–9194.
- 28 X. Z. Wang, S. Qiu, G. X. Lu, C. Z. He, J. R. Liu, L. Q. Luan and W. Liu, *CrystEngComm*, 2014, **16**, 1802–1809.
- 29 S. B. Wang, Y. B. Ren, G. R. Liu, Y. L. Xing and S. C. Zhang, *Nanoscale*, 2014, **6**, 3508–3512.
- 30 X. W. Li, X. N. Shang, D. Li, H. W. Yue, S. Y. Wang, L. Qiao and D. Y. He, *Part. Part. Syst. Character.*, 2014, DOI: 10.1002/ppsc.201400010.
- 31 H. L. Wang, Z. W. Xu, Z. Li, K. Cui, J. Ding, A. Kohandehghan, X. H. Tan, B. Zahiri, B. C. Olsen, C. M. B. Holt and D. Mitlin, *Nano Lett.*, 2014, **14**, 1987–1994.
- 32 G. Q. Zhang, H. B. Wu, H. E. Hoster and X. W. Lou, *Energy Environ. Sci.*, 2014, **7**, 302–305.
